# Supplementary material for: Evaluation of cerium modification over Cr/Ti-PILC for NO catalytic oxidation and their mechanism study
Source: Royal Society of Chemistry journal article supplement (doi:10.1039/c4ra05471g), 2014-08-15
Supplement: c4ra05471g1.pdf [file c4ra05471g1.pdf]

## Supplementary

**Fig. S1.** XPS spectra of O 1s in the Cr/Ti-PILC and CrCe(0.25)/Ti-PILC catalysts

**Fig. S2.** H<sub>2</sub>-TPR of fresh and used samples: Cr/Ti-PILC and CrCe(0.25)/Ti-PILC.

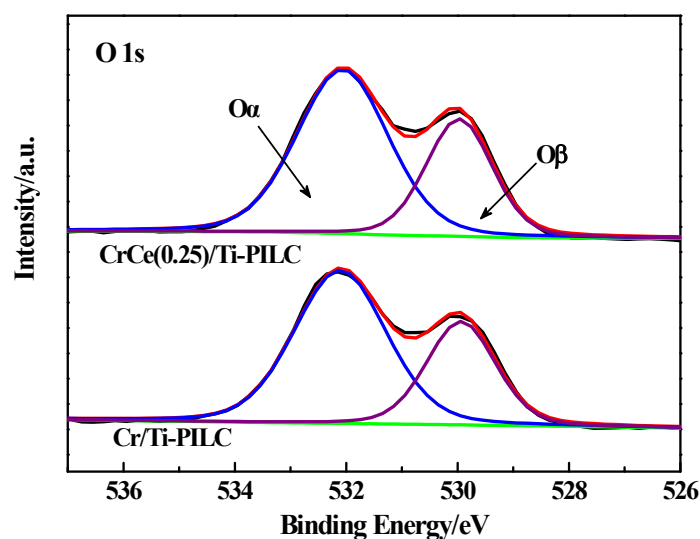

Fig. S1 XPS spectra of O 1s in the Cr/Ti-PILC and CrCe(0.25)/Ti-PILC catalysts

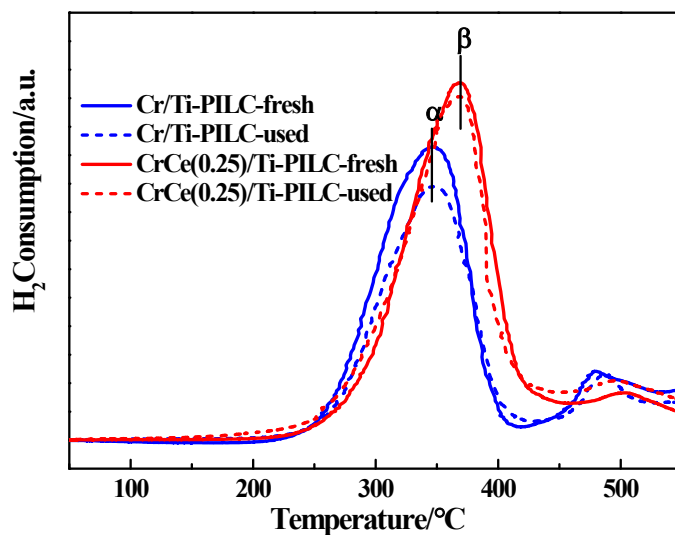

**Fig. S2.** H<sub>2</sub>-TPR of fresh and used samples: Cr/Ti-PILC and CrCe(0.25)/Ti-PILC.
